# Supplementary material for: A Novel Testis-specific GTPase Serves as a Link to Proteasome Biogenesis: Functional Characterization of RhoS/RSA-14-44 in Spermatogenesis
Source: PubMed Central journal article supplement — Mol Biol Cell. 2010 Dec 15;21(24):4312–24. doi: 10.1091/mbc.E10-04-0310 (PMC3002385; doi:10.1091/mbc.e10-04-0310), 2010-12-15

## **Supplemental Figures:**

### **Supplemental figure 1. Purified GST-RhoS for the GTPase activity assay**

GST-RhoS was expressed and purified as described in the methods. Purified GST-RhoS was resolved by SDS-PAGE and detected by Coomassie blue with a defined amount of GST as a homogeneity control.

### **Supplemental figure 2. C190S mutation leads to an abnormal subcellular location of RhoS**

HEK293T cells transfected with the indicated plasmids were lysed in buffer A containing 0.5% Triton X-100. The supernatant (S) was obtained by centrifugation, and the pellet fraction (P) containing nuclei and membrane parts were harvested and resuspended in 1×SDS sample buffer. Equal amounts of supernatant (S) and pellet (P) fractions were resolved by SDS-PAGE followed by immunoblotting. The levels of GAPDH and LaminA+C were also included not only as the loading controls but also as the makers for different subcellular fractions.

### **Supplemental figure 3. Sequence comparison of RhoS with RhoA homologs from different species**

The alignment was performed by DNAMAN. Homology levels are highlighted in different colors. Black: 100%; Pink: 75%; Blue: 50%. The residues conserved between RhoS and 4930544G11Rik (mRhoS) but significantly distinct from RhoA homologs are indicated by arrow heads. h, *Homo sapiens*; m, *Mus musculus*; r, *Rattus norvegicus*; Pa, *Pan troglodytes*; Bos, *Bos taurus*; Ga, *Gallus gallus*; Da, *Danio rerio*;

Ce, *Caenorhabditis elegans*; Dr, *Drosophila melanogaster*; Xe, *Xenopus laevis*.

**Supplemental figure 4. Evaluating the association between PSMB5 precursor and three Rho isoforms (RhoA, RhoB and RhoC)**

Co-immunoprecipitation of PSMB5 precursor with RhoA, RhoB or RhoC was observed and compared with RhoS.

**Supplemental figure 5. Evaluating the effect of RhoA, RhoB and RhoC on the protein stability of PSMB5 precursor**

HEK239T cells co-expressing the indicated proteins were treated with CHX (100µg/ml) for inhibiting the protein synthesis, and harvested at the corresponding time points. The observation performed on the group transfected with empty vector or RhoS was taken as negative and positive controls for the analysis.

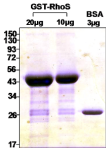

**Supernatant**

**Pellet**

**C190S**

**WT**

**C190S**

**WT**

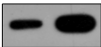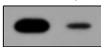

**IB  $\alpha$ -Flag**

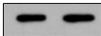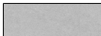

**IB  $\alpha$ -GAPDH**

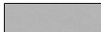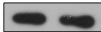

**IB  $\alpha$ -LaminA+C**

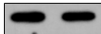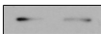

**IB  $\alpha$ -GFP**

**hRhoA** MAIRKKKIVVGDGACGRTCLLIVFSKDQFEVYVPTVFENYADIEVDGKQVELALNDTAGQEDYDLRRLPLSYPTDVLDMCFSIDSPDSLENIPERWT  
**mRhoA** MAIRKKKIVVGDGACGRTCLLIVFSKDQFEVYVPTVFENYADIEVDGKQVELALNDTAGQEDYDLRRLPLSYPTDVLDMCFSIDSPDSLENIPERWT  
**rRhoA** MAIRKKKIVVGDGACGRTCLLIVFSKDQFEVYVPTVFENYADIEVDGKQVELALNDTAGQEDYDLRRLPLSYPTDVLDMCFSIDSPDSLENIPERWT  
**RhoS** MAIRKKKIVVGDGACGRTCLLIVFSKDQFEVYVPTVFENYADIEVDGKQVELALNDTAGQEDYDLRRLPLSYPTDVLDMCFSIGNPDSFGNIPERWT  
**mRhoS** MAIRKKKIVVGDGACGRTCLLIVFSKDQFEVYVPTVFENYADIEVDGKQVELALNDTAGQEDYDLRRLPLSYPTDVLDMCFSIGNPDSFGNIPERWT  
**Pa\_RhoA** MAIRKKKIVVGDGACGRTCLLIVFSKDQFEVYVPTVFENYADIEVDGKQVELALNDTAGQEDYDLRRLPLSYPTDVLDMCFSIDSPDSLENIPERWT  
**Ga\_RhoA** MAIRKKKIVVGDGACGRTCLLIVFSKDQFEVYVPTVFENYADIEVDGKQVELALNDTAGQEDYDLRRLPLSYPTDVLDMCFSIDSPDSLENIPERWT  
**Da\_rhoaa** MAIRKKKIVVGDGACGRTCLLIVFSKDQFEVYVPTVFENYADIEVDGKQVELALNDTAGQEDYDLRRLPLSYPTDVLDMCFSIDSPDSLENIPERWT  
**Da\_rhoab** MAIRKKKIVVGDGACGRTCLLIVFSKDQFEVYVPTVFENYADIEVDGKQVELALNDTAGQEDYDLRRLPLSYPTDVLDMCFSIDSPDSLENIPERWT  
**Da\_rhoad** MAIRKKKIVVGDGACGRTCLLIVFSKDQFEVYVPTVFENYADIEVDGKQVELALNDTAGQEDYDLRRLPLSYPTDVLDMCFSVDSFDSLENIPERWT  
**Ce\_rho1** MAIRKKKIVVGDGACGRTCLLIVFSKDQFEVYVPTVFENYADIEVDGKQVELALNDTAGQEDYDLRRLPLSYPTDVLDMCFSIDSPDSLENIPERWT  
**Dr\_rho1** MGRIRKKKIVVGDGACGRTCLLIVFSKDQFEVYVPTVFENYADIEVDGKQVELALNDTAGQEDYDLRRLPLSYPTDVLDMCFSVDSFDSLENIPERWT  
**Xe\_rhoC** MAIRKKKIVVGDGACGRTCLLIVFSKDQFEVYVPTVFENYADIEVDGKQVELALNDTAGQEDYDLRRLPLSYPTDVLDMCFSIDSPDSLENIPERWT  
**Censusus** m irkklivvgdgaagrtcllivfskdqfp vyvptvfeny adiewd kqvelalndtaggedydlrrlplsypdtvl d l cfs pds nip kw

▲▲▲▲▲

193

**hRhoA** FEVDFHCENVP III VGNKDLRNDERTRELDANMKQEFVKPEECRIMANRIGASCMBCSAKTRGCVREVFEMATFAALCARRGKWKSGCLIVL  
**mRhoA** FEVDFHCENVP III VGNKDLRNDERTRELDANMKQEFVKPEECRIMANRIGASCMBCSAKTRGCVREVFEMATFAALCARRGKWKSGCLIL  
**rRhoA** FEVDFHCENVP III VGNKDLRNDERTRELDANMKQEFVKPEECRIMANRIGASCMBCSAKTRGCVREVFEMATFAALCARRGKWKSGCLIL  
**RhoS** FEVDFHCENVP III VGNKDLRNDERTRELDANMKQEFVKPEEGDRLANSIGAREYVBCSAKTRGCVREVFEMATFAALCENRVRKWKSGCIVF  
**mRhoS** FEVDFHCENVP III VGNKDLRNDERTRELDANMKQEFVKPEEGDRLANSIGAREYVBCSAKTRGCVREVFEMATFAALCENRVRKWKSGCIVF  
**Pa\_RhoA** FEVDFHCENVP III VGNKDLRNDERTRELDANMKQEFVKPEECRIMANRIGASCMBCSAKTRGCVREVFEMATFAALCARRGKWKSGCLIVL  
**Ga\_RhoA** FEVDFHCENVP III VGNKDLRNDERTRELDANMKQEFVKPEECRIMANRIGASCMBCSAKTRGCVREVFEMATFAALCARRGKWKSGCLIL  
**Da\_rhoaa** FEVDFHCENVP III VGNKDLRNDERTRELDANMKQEFVKPEECRIMANRIGASCMBCSAKTRGCVREVFEMATFAALCARRGKWKSGCLIL  
**Da\_rhoab** FEVDFHCENVP III VGNKDLRNDERTRELDANMKQEFVNAEECRIMANRIGASCMBCSAKTRGCVREVFEMATFAALCARRGKWKSGCLIL  
**Da\_rhoad** FEVDFHCENVP III VGNKDLRNDERTRELDANMKQEFVKPEECRIMANRIGASCMBCSAKTRGCVREVFEMATFAALCARRGKWKSGCLIL  
**Ce\_rho1** FEVDFHCENVP III VGNKDLRNDERTRELDANMKQEFVKPEEGDRLANSIGAREYVBCSAKTRGCVREVFEMATFAALCARRGKWKSGCLIL  
**Dr\_rho1** FEVDFHCENVP III VGNKDLRNDERTRELDANMKQEFVKPEEGDRLANSIGAREYVBCSAKTRGCVREVFEMATFAALCARRGKWKSGCLIL  
**Xe\_rhoC** FEVDFHCENVP III VGNKDLRNDERTRELDANMKQEFVKPEECRIMANRIGASCMBCSAKTRGCVREVFEMATFAALCARRGKWKSGCLIL  
**Censusus** pev hfcenvp iiii vgn kdlr ndert rre l d anmk qef vkp ee crim an r i g a s c m b c s a k t r g c v r e v f e m a t f a a l c a r r g k w k s g c l i v l

▲▲▲▲▲

**+ PSMB5-Myc**

*RhoA*   *RhoB*   *RhoC*   *RhoS*   -

**IP  $\alpha$ -Flag**

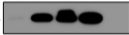

**P** IB  $\alpha$ -Myc

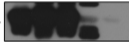

IB  $\alpha$ -Flag

**Input (1%)**

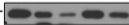

**P** IB  $\alpha$ -Myc

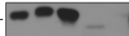

IB  $\alpha$ -Flag

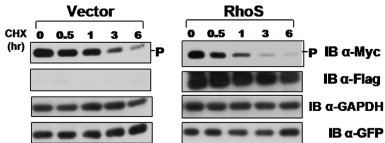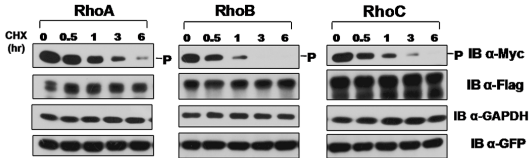

Supplement: E10-04-0310_1.pdf [file E10-04-0310_1.pdf]
